# Supplementary material for: An evidence-based method for assessing the value of a search tool: a pilot study
Source: PubMed Central journal article supplement (PMC6148619; doi:10.5195/jmla.2018.287), 2018-10-01
Supplement: jmla-106-471-s001.pdf [file jmla-106-471-s001.pdf]

## An evidence-based method for assessing the value of a search tool: a pilot study

Donald Stanley Pearson, MBA, MLIS, AHIP; Stevo Roksandic, MBA, MLIS, AHIP; Jill Kilanowski, PhD, RN, APRN, CPNP, FAAN

### APPENDIX A

#### eSearcher survey results

83 total responses

1. How often do you use the Internet?

| Answer  | # responses | Total number | Percent |
|---------|-------------|--------------|---------|
| Daily   | 80          | 82           | 97.56   |
| Weekly  | 2           | 82           | 2.44    |
| Monthly | 0           | 82           | 0       |

2. What is your age group?

| Answer | # responses | Total number | Percent |
|--------|-------------|--------------|---------|
| 26-30  | 27          | 82           | 32.93   |
| 31-35  | 20          | 82           | 24.39   |
| 50>    | 16          | 82           | 19.51   |
| 41-45  | 8           | 82           | 9.76    |
| 36-40  | 4           | 82           | 4.88    |
| 46-50  | 4           | 82           | 4.88    |
| 21-25  | 3           | 82           | 3.66    |
| <20    | 0           | 82           | 0       |

3. What is your gender?

| Answer | #responses | Total number | Percent |
|--------|------------|--------------|---------|
| Female | 52         | 83           | 62.65   |
| Male   | 31         | 83           | 37.35   |

4. I visit the Mount Carmel Health System (MCHS) Library website:

| Answer               | # responses | Total number | Percent |
|----------------------|-------------|--------------|---------|
| Several times a week | 33          | 83           | 39.76   |
| Weekly               | 17          | 83           | 20.48   |
| Monthly              | 16          | 83           | 19.28   |
| Rarely               | 9           | 83           | 10.84   |
| Daily                | 8           | 83           | 9.64    |

5. I access the MCHS Library most often:

| Answer                           | # responses | Total number | Percent |
|----------------------------------|-------------|--------------|---------|
| From home                        | 42          | 83           | 50.60   |
| At work                          | 29          | 83           | 34.94   |
| Remotely using a portable device | 8           | 83           | 9.64    |
| In the MCHS Library              | 3           | 83           | 3.61    |
| Other                            | 1           | 83           | 1.20    |

6. I visit MCHSL website because I need (check all that apply):

| Answer                                                                             | # responses | Percent |
|------------------------------------------------------------------------------------|-------------|---------|
| To find articles                                                                   | 70          | 84.34   |
| To find information for research                                                   | 66          | 79.52   |
| To find information for clinical patient care                                      | 53          | 63.86   |
| To find information for school/self-education                                      | 53          | 63.86   |
| To find/use electronic resources such as databases, e-journals, e-books, etc.      | 50          | 60.24   |
| To locate Policies & Procedures and/or Standards & Guidelines                      | 17          | 20.48   |
| To locate information about the library, read news, look for new library materials | 4           | 4.82    |
| Other                                                                              | 2           | 2.41    |

7. In which MCHS graduate education program are you enrolled?

| Answer           | # responses | Total number | Percent |
|------------------|-------------|--------------|---------|
| Graduate nursing | 40          | 76           | 52.63   |
| Graduate medical | 36          | 76           | 47.37   |
| Skipped          | 7           | 83           |         |

8. If you are enrolled in graduate nursing education program, please choose the program you are enrolled in and how many credit hours have you completed?

| Answer                   | <10          | 11-20 | 21-30 | 31> | Total |
|--------------------------|--------------|-------|-------|-----|-------|
| Adult-Gero CSN           | 0            | 0     | 5     | 0   | 5     |
| Adult-Gero Acute Care NP | 1            | 0     | 1     | 1   | 3     |
| Family NP                | 3            | 4     | 1     | 4   | 12    |
| Nursing administration   | 1            | 2     | 2     | 4   | 9     |
| Nursing education        | 3            | 2     | 6     | 3   | 14    |
| Total                    | 8            | 8     | 15    | 12  | 43    |
| Skipped                  | 40 out of 83 |       |       |     |       |

9. If you are enrolled in Graduate Medical Education Residency Program, please choose the program you are enrolled in and what year of residency you are in.

| Answer                   | PGY-1        | PGY-2 | PGY-3 | PGY-4 | PGY-5 | PGY-6 | Total |
|--------------------------|--------------|-------|-------|-------|-------|-------|-------|
| Family medicine          | 2            | 1     | 1     | 1     | 0     | 0     | 5     |
| Internal medicine        | 7            | 3     | 3     | 1     | 0     | 0     | 14    |
| Orthopedic Surgery       | 2            | 1     | 1     | 0     | 1     | 0     | 5     |
| Transitional year        | 2            | 1     | 0     | 1     | 1     | 1     | 6     |
| OB/GYN                   | 4            | 0     | 0     | 0     | 0     | 0     | 4     |
| Colon and rectal surgery | 0            | 0     | 0     | 1     | 0     | 0     | 1     |
| Total                    | 0            | 0     | 0     | 0     | 0     | 0     | 0     |
| Total                    | 17           | 6     | 5     | 4     | 2     | 1     | 35    |
| Skipped                  | 49 out of 83 |       |       |       |       |       |       |

10. How often do you use Google to find clinical information?

| Answer                                   | # responses | Percent |
|------------------------------------------|-------------|---------|
| Daily                                    | 35          | 42.17   |
| Weekly                                   | 24          | 28.92   |
| When I do not find answers anywhere else | 15          | 18.07   |
| Never                                    | 5           | 6.02    |
| Monthly                                  | 4           | 4.82    |

11. Where do you prefer to search for clinical information?

| Answer            | # responses | Percent |
|-------------------|-------------|---------|
| MCHS Library site | 54          | 71.05   |
| Google            | 22          | 28.95   |
| Skipped           | 7 of 83     | 8.43    |

12. Please choose your preferred database used to search for clinical information for your medical education:

| Answer                                             | # responses | Percent |
|----------------------------------------------------|-------------|---------|
| UpToDate                                           | 29          | 34.94   |
| EBSCO Nursing Databases                            | 16          | 19.28   |
| CINAHL                                             | 15          | 18.07   |
| PubMed                                             | 11          | 13.25   |
| MCHS Library eSearcher                             | 8           | 9.64    |
| Clinical Key                                       | 3           | 3.61    |
| Lippincott Nursing Resources (Advisor, Procedures) | 1           | 1.20    |
| Cochrane Library                                   | 0           | 0       |

13. Please share briefly why do you prefer this database resource over the Google option? (65 text responses)

---

14. How familiar are you with MCHS Library eSearcher?

| Answer                | # responses | Percent |
|-----------------------|-------------|---------|
| Completely unfamiliar | 28          | 34.57   |
| Somewhat familiar     | 24          | 29.63   |
| Familiar              | 23          | 28.40   |
| Very familiar         | 6           | 7.41    |
| Skipped               | 2           | 2.40    |

15. If you are familiar with eSearcher, how often do you use this MCHSL eSearcher?

| Answer       | # responses | Percent |
|--------------|-------------|---------|
| Occasionally | 22          | 32.35   |
| Never        | 18          | 26.47   |
| Often        | 18          | 26.47   |
| Not sure     | 8           | 11.76   |
| Very often   | 2           | 2.94    |
| Skipped      | 15 of 83    | 18.07   |

16. If you are somewhat familiar, familiar, or very familiar with eSearcher, please rate the quality of eSearcher on the following factors:

| Answer                                | Poor         | Fair | Good | Excellent | N/A | Total | Wt. Avg. |
|---------------------------------------|--------------|------|------|-----------|-----|-------|----------|
| Comprehensiveness, breadth, and depth | 1            | 10   | 27   | 15        | 8   | 61    | 3.06     |
| Clear and understandable language     | 1            | 10   | 28   | 13        | 8   | 60    | 3.02     |
| Usefulness of information             | 1            | 12   | 27   | 13        | 8   | 61    | 2.98     |
| General appearance                    | 1            | 11   | 31   | 10        | 8   | 61    | 2.94     |
| Dissemination of information          | 1            | 12   | 30   | 8         | 9   | 60    | 2.88     |
| Layout                                | 1            | 11   | 34   | 6         | 8   | 60    | 2.87     |
| Intuitive interface                   | 2            | 12   | 32   | 5         | 10  | 61    | 2.78     |
| Navigation and ease of use            | 2            | 16   | 28   | 7         | 8   | 61    | 2.75     |
| Ability to find what I need           | 4            | 17   | 24   | 8         | 8   | 61    | 2.68     |
| Skipped                               | 22 out of 83 |      |      |           |     |       |          |

17. Would you be interested in receiving additional training and guidelines in familiarization and usage of this MCHSL eSearcher?

| Answer                | # responses | Percent |
|-----------------------|-------------|---------|
| Yes                   | 47          | 57.32   |
| No                    | 32          | 39.02   |
| Other, please specify | 3           | 3.66    |
| Skipped               | 1 of 83     | 1.20    |
