# Supplementary material for: An evidence-based method for assessing the value of a search tool: a pilot study
Source: PubMed Central journal article supplement (PMC6148619; doi:10.5195/jmla.2018.287), 2018-10-01
Supplement: jmla-106-471-s002.pdf [file jmla-106-471-s002.pdf]

## An evidence-based method for assessing the value of a search tool: a pilot study

Donald Stanley Pearson, MBA, MLIS, AHIP; Stevo Roksandic, MBA, MLIS, AHIP; Jill Kilanowski, PhD, RN, APRN, CPNP, FAAN

### APPENDIX B

#### eSearcher study paper response form

|                                                                                                                                                                                                                                                                                                                                                                                                                                                                                                                                                                                                                                                                                                                                                                                                                                                                                 |                                                                                                                              |                          |                   |
|---------------------------------------------------------------------------------------------------------------------------------------------------------------------------------------------------------------------------------------------------------------------------------------------------------------------------------------------------------------------------------------------------------------------------------------------------------------------------------------------------------------------------------------------------------------------------------------------------------------------------------------------------------------------------------------------------------------------------------------------------------------------------------------------------------------------------------------------------------------------------------|------------------------------------------------------------------------------------------------------------------------------|--------------------------|-------------------|
| Directions:                                                                                                                                                                                                                                                                                                                                                                                                                                                                                                                                                                                                                                                                                                                                                                                                                                                                     |                                                                                                                              | MCHSLS Use ONLY:         |                   |
| 1. Enter your demographic information. This is a confidential, Mount Carmel Health System (MCHSLS) Institutional Review Board approved study.<br>2. Search prompt: Please locate the most current guideline for the diagnosis and management of asthma in a 55-year-old male patient.<br>3. Enter search Start Time.<br>4. When your information search is concluded, enter End Time.<br>5. Write in the answer to the search prompt; please leave your search screen open on the computer you used.<br>6. Rank your confidence level (1-7) that your search resulted in information that could be used in an actual patient care setting. If you did not find a suitable answer, make note of that in the comments section, along with the reason. (i.e., got a page/call.) Even if you did not get an answer, please indicate where you searched.<br>7. Add optional comments |                                                                                                                              |                          |                   |
| Date: 2/17/2016                                                                                                                                                                                                                                                                                                                                                                                                                                                                                                                                                                                                                                                                                                                                                                                                                                                                 | Start time:                                                                                                                  | End time:                | Total time:       |
| Demographic information (circle ONE):                                                                                                                                                                                                                                                                                                                                                                                                                                                                                                                                                                                                                                                                                                                                                                                                                                           |                                                                                                                              | Nursing graduate student |                   |
| Male or Female<br>Age range:<br><20    21-25    26-30    31-35    36-40    41-45    46-50    50>                                                                                                                                                                                                                                                                                                                                                                                                                                                                                                                                                                                                                                                                                                                                                                                |                                                                                                                              |                          |                   |
| Answer:                                                                                                                                                                                                                                                                                                                                                                                                                                                                                                                                                                                                                                                                                                                                                                                                                                                                         | Search terms used:<br>Title:<br>Database/Internet resource used:<br>Publication, if applicable:<br>Date of article/resource: |                          | Assessment:       |
| Level of confidence (check one)                                                                                                                                                                                                                                                                                                                                                                                                                                                                                                                                                                                                                                                                                                                                                                                                                                                 | Not at all confident                                                                                                         | Extremely confident      | Confidence score: |
|                                                                                                                                                                                                                                                                                                                                                                                                                                                                                                                                                                                                                                                                                                                                                                                                                                                                                 | 1            2            3            4            5            6            7                                              |                          |                   |
| Comments:                                                                                                                                                                                                                                                                                                                                                                                                                                                                                                                                                                                                                                                                                                                                                                                                                                                                       |                                                                                                                              |                          |                   |
